1 **RUNNING HEAD: Complete transfer between component and pattern motion**

2

3

4 **Disentangling locus of perceptual learning in the visual**  
5 **hierarchy of motion processing**

6

7

Ruyuan Zhang<sup>1,2</sup>, Dujie Tadin<sup>1,3</sup>

8

9 <sup>1</sup>Department of Brain & Cognitive Sciences and Center for Visual Science, University of  
10 Rochester, Rochester, NY, 14627, USA.

11

<sup>2</sup>Center for Magnetic Resonance Research, Department of Radiology, University of  
12 Minnesota at Twin Cities, Minneapolis MN, 55455, USA.

13

<sup>3</sup>Departments of Ophthalmology and Neuroscience, University of Rochester Medical  
14 Center, Rochester, NY, 14642, USA.

15

16

17 Corresponding author

18

Ruyuan Zhang

19

Center for Magnetic Resonance Research

20

University of Minnesota

21

1210 Fifield AVE

22

Falcon Heights, MN 55108

23

585-752-6673

24

ryuanzhang@gmail.com

25

26

27

28

29

30

31

32 **ABSTRACT**

33 Visual perceptual learning (VPL) can lead to long-lasting perceptual improvements.  
34 While the efficacy of VPL is well established, there is still a considerable debate about  
35 what mechanisms underlie the effects of VPL. Much of this debate concentrates on where  
36 along the visual processing hierarchy behaviorally relevant plasticity takes place. Here,  
37 we aimed to tackle this question in context of motion processing, a domain where links  
38 between behavior and processing hierarchy are well established. Specifically, we took  
39 advantage of an established transition from component-dependent representations at the  
40 earliest level to pattern-dependent representations at the middle-level of cortical motion  
41 processing. We trained two groups of participants on the same motion direction  
42 identification task using either grating or plaid stimuli. A set of pre- and post-training  
43 tests was used to determine the degree of learning specificity and generalizability. This  
44 approach allowed us to disentangle contributions from both low- and mid-level motion  
45 processing, as well as high-level cognitive changes. We observed a complete bi-  
46 directional transfer of learning between component and pattern stimuli as long as they  
47 shared the same apparent motion direction. This result indicates learning-induced  
48 plasticity at intermediate levels of motion processing. Moreover, we found that motion  
49 VPL is specific to the trained stimulus direction, speed, size, and contrast, highlighting  
50 the pivotal role of basic visual features in VPL, and diminishing the possibility of non-  
51 sensory decision-level enhancements. Taken together, our study psychophysically  
52 examined a variety of factors mediating motion VPL, and demonstrated that motion VPL  
53 most likely alters visual computation in the middle stage of motion processing.

54

55

## 56 INTRODUCTION

57 A large body of evidence has shown that the human visual system can gain long-lasting  
58 perceptual improvements following several sessions of perceptual training. This  
59 phenomenon, called visual perceptual learning (VPL), has been an active area of research  
60 because VPL is a remarkable demonstration that human vision can remain plastic even in  
61 adulthood <sup>1,2</sup>. Numerous studies have revealed training-induced perceptual improvements  
62 on a wide range of visual tasks, including low-level contrast and orientation  
63 discrimination tasks <sup>3,4,5,6</sup>, mid-level motion and form tasks <sup>7,8,9</sup> and even high-level  
64 object and face recognition tasks <sup>10,11</sup>.

65 While the robustness of learning effects is well established, debate persists with  
66 respect to the mechanisms underlying VPL. Early psychophysical work found that  
67 learning effects are usually confined to the trained parameters <sup>6,12</sup>. Such strong specificity  
68 suggests that VPL most likely takes place within low-level visual areas (e.g., V1 or V2)  
69 since neurons therein exhibit narrow ranges of spatial and feature selectivity (e.g.,  
70 orientation, motion direction). Recent evidence, however, challenges this idea by  
71 revealing an increasing number of cases where the transfer of VPL is viable to novel  
72 stimulus conditions and tasks <sup>13,14</sup>. This is consistent with an involvement of higher-level  
73 visual areas, wherein neurons usually respond to larger spatial areas and more complex  
74 stimulus features. Some studies even suggest the contributions from the brain areas that  
75 process non-sensory attributes. For instance, perceptual learning might manifest as the  
76 change of decision variables encoded in the prefrontal cortex <sup>15</sup>. Alternatively, perceptual  
77 learning might facilitate encoding of abstract concepts representing basic visual features  
78 (e.g., orientation and contrast) <sup>16</sup> or lead to a better set of task-specific rules <sup>17</sup>. Given that  
79 these theories postulate changes beyond canonical sensory mechanisms, we refer to them  
80 as ‘non-sensory’ learning processes.

81 The task of linking VPL to specific brain areas is complicated by the complex  
82 functional specializations of the brain. The brain includes multiple brain regions that are  
83 organized into a coarse, but richly interconnected hierarchy <sup>18,19</sup>. Even a simple  
84 perceptual choice likely arises from the interplay among multiple brain regions. One  
85 strategy is to take advantage of visual processes where links between behavior and neural  
86 structures are well established. Here, we focus on VPL in context of motion perception, a

87 perceptual domain where we have a relatively advanced understanding of different  
88 processing stages [20](#). In primates, neurons selective to motion direction first occur in the  
89 earliest cortical areas V1 and V2 [21](#). However, conscious motion perception is most  
90 closely linked to intermediate visual areas, such as MT and V3A. These areas contain a  
91 large portion of neurons showing strong preferential responses to different motion  
92 directions [22,23,24,25](#). In addition, perceptual decisions based on motion stimuli have been  
93 linked to several higher-level brain areas (e.g., lateral intraparietal cortex (LIP) and  
94 prefrontal cortex). These areas are often ascribed as “evidence accumulators” that  
95 integrate sensory information provided by the upstream motion processing units in order  
96 to form perceptual decisions and guide visual behaviors [26,27](#) (but see ref. [28](#)). Finally, non-  
97 sensory attributes, such as task rules and decision strategies, encoded in high-level  
98 cognitive areas, can also mediate performance in motion perception tasks [29](#). This  
99 complex hierarchy can be operationalized as a symbolic three-layer network (Figure 1).  
100 This network consists of a low-level (e.g., V1/V2), a middle level (e.g., MT/V3A) and a  
101 high-level (e.g., LIP, prefrontal cortex) processing stage.

102 In contrast with the established understanding of visual motion processing stages,  
103 their role in human VPL is largely unknown. To address this question, we took advantage  
104 of an established transition from component-dependent representations at the earliest  
105 level to pattern-dependent representations in the middle-level of cortical motion  
106 processing [30,31](#). A plaid stimulus composed of two obliquely moving gratings (Figure 1)  
107 is generally perceived as a rigid object moving horizontally [32](#). While many MT neurons  
108 faithfully respond to the perceived motion direction in moving plaids, neurons in V1  
109 primarily respond to the directions of two component gratings [30,31](#). This dissociation  
110 allows us to psychophysically infer the main locus of the behaviorally related plasticity  
111 induced by motion VPL. If learning effects are specific to the trained component motion,  
112 irrespective of the perceived pattern motion, it would indicate component-dependent  
113 learning predominantly at the lowest levels of motion processing. Conversely, if learning  
114 effects are specific to the perceived pattern motion, it would point toward pattern-  
115 dependent learning at middle-levels of motion processing. If this learning still retains  
116 some sensory-level specificity (e.g., speed, size and velocity), we can conclude that non-

117 sensory cognitive processes are not the major drivers of the observed behavioral  
118 improvement.

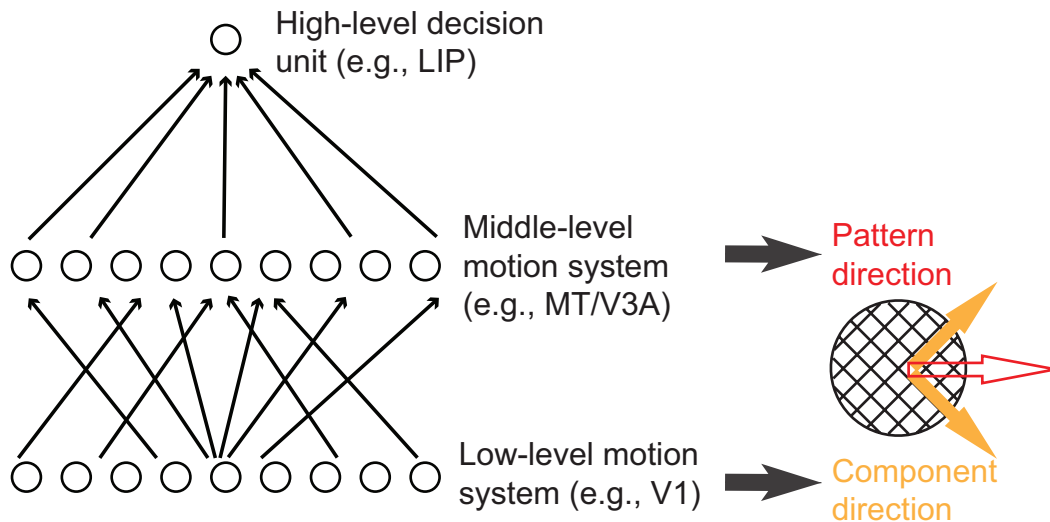

119

120 Figure 1. A simplified hierarchy of visual motion processing with three  
121 hierarchical stages <sup>20</sup>. Neurons in the low-level motion system respond  
122 best to component directions of plaid stimuli (full orange arrows).  
123 Neurons in the middle-level motion system respond selectively to the  
124 perceived pattern motion direction (empty red arrow). In this and all  
125 subsequent figures, empty arrows indicate faster perceived speed  
126 associated with plaid motion. The third stage involves complex sensory  
127 and non-sensory high-level cognitive processes.

128

## 129 **METHODS AND EXPERIMENTAL PROCEDURES**

### 130 **Participants and apparatus**

131 Fourteen undergraduate students from University of Rochester (18 to 22 years old, 5  
132 males and 9 females) took part in this study. All participants had normal or corrected-to-  
133 normal vision. The Research Subjects Review Board at the University of Rochester  
134 approved experimental protocols and all participants provided written consent forms.  
135 Stimuli were generated by Matlab Psychtoolbox <sup>33</sup> and presented using customized  
136 digital light processing (DLP) projector (DepthQ WXGA 360 driven by a NVIDIA  
137 Quadro FX 4800 at 1280 × 720 resolution). The projector frame rate was 360 Hz,  
138 resulting in discrete 2.78-ms frames. DLP projectors are natively linear, and this was  
139 verified with a Minolta LS-110 photometer. Viewing distance was 61.5 inches, with a  
140 projected image of 46.74 × 25 inches.

141

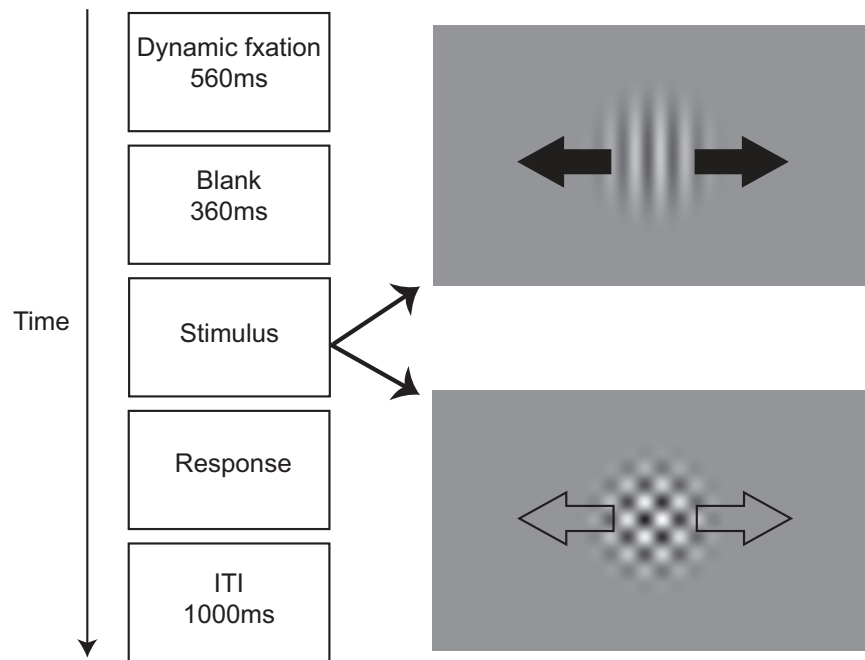

142

143 Figure 2. Task illustration showing trial structure used for all training, pre-  
144 and post-test conditions. Participants viewed a moving stimulus that was  
145 either a grating or a plaid (arrows are for illustration purposes only).  
146 Stimulus duration varied on each trial, as determined by two interleaved  
147 staircases. Participants indicated the perceived stimulus direction via  
148 button press (e.g., left vs. right in this case).

149

### 150 **Stimulus and task settings**

151 Participants were randomly assigned into two groups – one group trained on component  
152 motion (grating; N = 8) and another group trained on pattern motion stimuli (plaid; N =  
153 6). All participants were tested and trained on a two-alternative forced choice motion  
154 direction identification task (Figure 2), reporting the perceived stimulus motion direction  
155 via key press. Auditory feedback was provided after each trial during the training phase  
156 but not at pre-/post-test (to minimize learning effects in pre-/post-test). To facilitate  
157 fixation, we used the following fixation sequence (Figure 2): a fixation circle (0.8°  
158 radius) appeared after each key press response and, the circle shrank to 0.13° over 200  
159 ms, remained at that size for 360 ms, and then disappeared 360 ms before stimulus onset.  
160 We found in our previous work that this dynamic fixation sequence was very effective in  
161 guiding eye gaze to the center of the screen before the stimulus onset <sup>34</sup>. The inter-trial  
162 interval was 1000 ms.

163           As detailed below, the two training groups used partially overlapping sets of pre-  
164 and post-test conditions. We selected this design to limit pre- and post-test sessions to  
165 only the most diagnostic test conditions for each group. This allowed us to test the  
166 bidirectional transfer between component and pattern motion, as well as the dependency  
167 of learning transfer on several key low-level stimulus features.

168           In the component-training group, the training stimulus was a grating (contrast =  
169 50%, drift speed =  $4^\circ/\text{s}$ , radius =  $8^\circ$ , 2D raised cosine spatial envelope; spatial frequency  
170 = 1 cycle/ $^\circ$ ; Figure 3Aa). Training motion directions were either left/right or up/down,  
171 counterbalanced across participants. Motion directions for other stimulus conditions were  
172 adjusted according to the directions of trained stimuli. During the pre- and post-test,  
173 temporal duration thresholds (defined by the full-width at half-height of a hybrid between  
174 a Gaussian and a trapezoidal temporal envelope; see [35](#) for details) were measured across  
175 another five stimulus conditions: (1) a plaid stimulus moving in the trained directions  
176 (Figure 3Ab); (2) a plaid stimulus containing the trained component and moving  $45^\circ$   
177 away from the trained direction (Figure 3Ac); (3-5) moving gratings that matched the  
178 trained grating except that they differed in (3) direction and orientation (orthogonal to the  
179 trained direction; Figure 3Ad), (4) stimulus size (radius =  $1^\circ$ , Figure 3Ae), and (5)  
180 contrast (contrast = 2%, Figure 3Af).

181

182

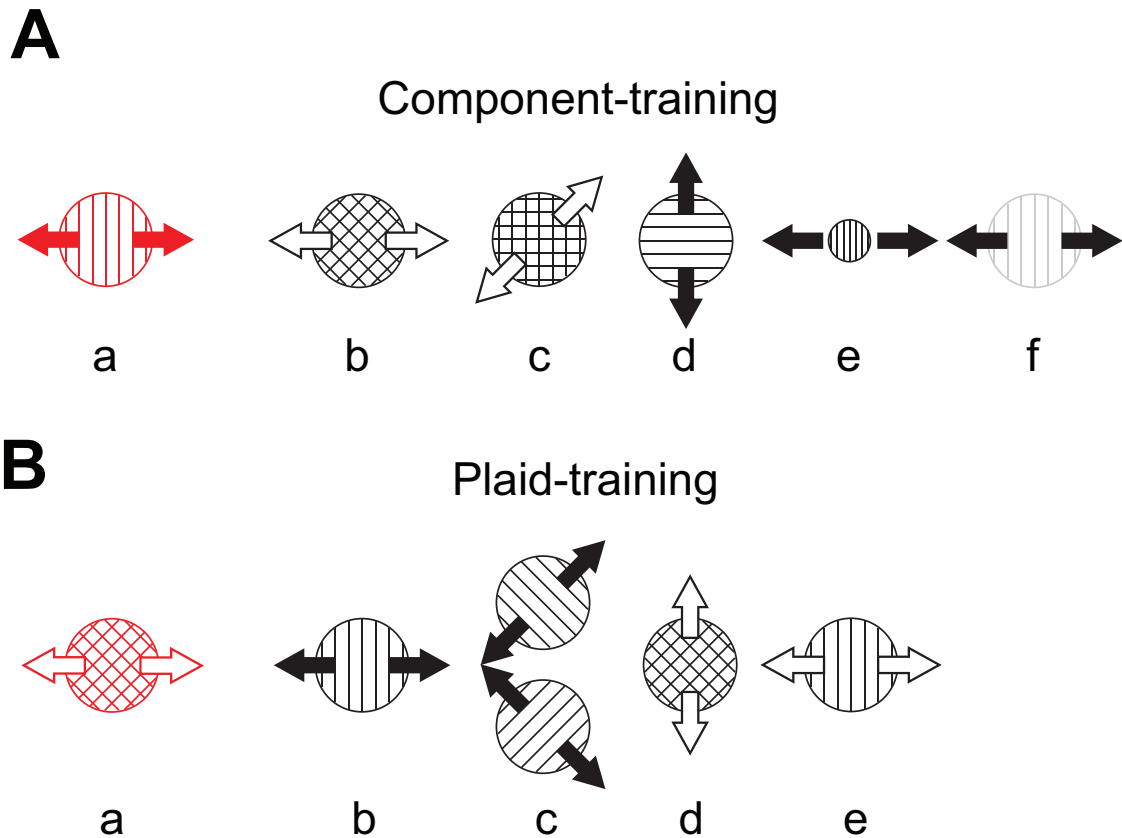

183

184

185

186

187

188

189

190

191

192

193

194

195

196

Figure 3. Pre- and post-training stimuli for (A) the component-training group and (B) the plaid-training group. The red icons show the training stimulus for each group. These conventions are kept in subsequent figures. With the exception of Be, the speed of all grating stimuli was  $4^\circ/s$  (marked by solid arrows). The plaid component speed was also  $4^\circ/s$ , which resulted in the apparent plaid speed of  $5.66^\circ/s$  (marked by empty arrows). To assess the effect of stimulus speed on transfer of learning, we also included a grating whose speed matched the plaid speed of  $5.66^\circ/s$  (Be, empty arrows). Although all stimulus conditions were conducted together, we analyze and present data into two batches: bidirectional transfer between component and pattern motion (Figure 5) and transfer to other stimulus features (Figure 6).

197

198

199

200

For the plaid-training group, the plaid stimuli consisted of two orthogonal component gratings (component contrast = 50%, size =  $8^\circ$ , 2D raised cosine spatial envelope; component spatial frequency = 1 cycle/ $^\circ$ ; Figure 3Ba). Component drift speed was  $4^\circ/s$ , which resulted in the plaid velocity of  $5.66^\circ/s$ . Training motion directions were



201 either left/right or up/down, counterbalanced across participants. In addition to the trained  
202 condition, duration thresholds were measured for five additional pre- and post-test  
203 stimulus conditions: (1) a moving grating with the same apparent direction and speed as  
204 the trained plaid stimulus (Figure 3Bb); (2, 3) two component gratings that constituted  
205 the trained plaid stimulus (i.e., gratings with direction  $\pm 45^\circ$  away from the trained  
206 directions; Figure 3Bc. Note that these data were collected in two separate blocks, each  
207 testing one motion direction axis, and subsequently averaged to get a single threshold  
208 estimate); (4) a plaid stimulus moving to the untrained directions, but comprised of same  
209 static component features (Figure 3Bd); (5) a grating moving in the trained directions  
210 (left/right) but with the original plaid apparent speed (speed =  $5.66^\circ/\text{s}$ , Figure 3Be).

211

### 212 **Experimental procedures and Data analysis**

213 Pre- and post-test consisted of six randomly ordered blocks corresponding to different  
214 stimulus conditions (the trained stimulus, plus 5 additional stimulus conditions, as  
215 described above). In each block, stimulus durations were controlled by two 80-trial  
216 interleaved staircases (a 2-down-1-up staircase and a 3-down-1-up staircase), yielding  
217 160 trials for each threshold estimate. The initial starting durations for two staircases  
218 were 100 ms and 110 ms, respectively. Pre- and post-test measurements were conducted  
219 on day 2 and day 7, respectively. On day 1, each participant completed a practice phase  
220 that was identical to the pre- and post-test battery, except that each block consisted of  
221 only 60 trials. The purpose of this practice day was to help stabilize pre-test  
222 measurements. The perceptual training lasted four days (days 3-6). On each day,  
223 participants completed seven 100-trial blocks, resulting in a total of 28 training blocks.  
224 For the first training block on the first training day (day 3), the initial starting durations  
225 for the two staircases were 100 ms and 110 ms. For all subsequent training blocks, the  
226 initial stimulus durations were the durations in the final trials of two staircases in the  
227 previous training block. All participants completed these seven experimental sessions  
228 within 14 days.

229 To estimate duration thresholds for each pre- and post-test condition, we fit  
230 Weibull psychometric functions to 160 trials of raw data using the maximum likelihood

231 method, estimating the thresholds at 82% correct. The amount of learning in each  
232 condition was estimated by computing percent of improvement (PI):

233 
$$PI = \frac{threshold_{pre} - threshold_{post}}{threshold_{pre}} * 100\% \quad (1)$$

234 where  $threshold_{pre}$  and  $threshold_{post}$  indicate duration thresholds for the corresponding  
235 pre- and post-test stimulus conditions. We used paired t-tests for comparisons of pre- and  
236 post-test thresholds and for comparison of PI across stimulus conditions. One-sample t-  
237 tests were used for assessing the statistical significance of PI against the null hypothesis  
238 of 0% PI. All t-tests were two-tailed and performed using Matlab Statistical and Machine  
239 Learning Toolbox.

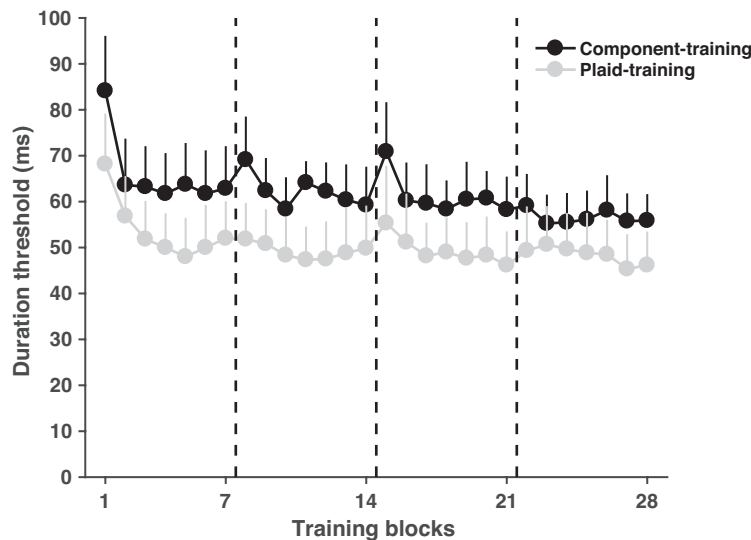

240

241 Figure 4. Learning curves for the component- (black) and the plaid-  
242 training (gray) group. Data are thresholds for 28 training blocks, tested  
243 over 4 days of training. Vertical dashed lines separate data for four  
244 training days. Note that the plaid-training group showed lower duration  
245 thresholds. This is expected given the faster apparent speed of plaid  
246 stimuli and known effects of stimulus speed on temporal duration  
247 thresholds <sup>36</sup>. Error bars are SEM across subjects.

248

## 249 RESULTS

### 250 Effective perceptual learning for both component and plaid stimuli

251 We first examined whether our training procedure was sufficient to result in perceptual  
252 improvement. Here, for each group, we compared pre- and post-test thresholds for the  
253 trained stimulus condition. The results revealed significant improvements in thresholds

254 for both the component- and the plaid-training group (Figure 5E;  $t(7) = 2.79$ ,  $p = 0.0268$   
255 and  $(5) = 6.28$ ,  $p = 0.0015$ , respectively). We also computed percent of improvement (PI,  
256 see Equation 1), and found significantly positive PIs for both groups (Figure 5F;  $t(7) =$   
257  $5.06$ ,  $p = 0.0015$ ;  $t(5) = 12.04$ ,  $p = 6.97 \times 10^{-6}$ ), with each group showing about a 20%  
258 improvement in performance.

259

## 260 **Bidirectional transfer of learning between component and plaid motions**

261 The main focus of this paper is to examine the transfer of perceptual learning to a range  
262 of diagnostic stimulus conditions. A two-stage criterion was used to assess transfer of  
263 learning. First, we concluded that learning transfers to a stimulus condition if the pre-  
264 /post-test difference on this condition was statistically significant. If a stimulus condition  
265 passed this first test, then we compared its PI to the corresponding trained condition (i.e.,  
266 either trained component or trained plaid). If the transfer PI was significantly smaller than  
267 the trained PI, the result was described as a “partial transfer”. Alternatively, if the PI for a  
268 transfer condition was not statistically smaller than the PI for its corresponding trained  
269 condition, we referred to it as “complete transfer”, according to an established convention  
270 in VPL research [13,16,17](#).

271 The key aim of this study was to determine whether perceptual training leads to  
272 plasticity within low-level component-dependent motion processing or middle-level  
273 pattern-dependent motion processing. To be precise, component-dependent plasticity  
274 predicts that training on a component motion stimulus should only transfer to the plaid  
275 composed of the trained component gratings, and that training on a plaid stimulus should  
276 only transfer to its two constituent components (Figure 5A-B). On the contrary, pattern-  
277 dependent plasticity predicts that training on a component motion stimulus or on a plaid  
278 motion stimulus that moves in the same directions should mutually transfer to each other  
279 (Figure 5C-D).

280 Our results were consistent with plasticity in pattern-dependent mechanisms. First,  
281 perceptual training on a component grating significantly reduced the duration thresholds  
282 on the plaid that moved in the same apparent direction as the trained grating (Figure 5E  
283 left panel, pre-/post-test,  $t(7) = 2.88$ ,  $p = 0.0237$ ; Figure 5F left panel, PI,  $t(7) = 3.08$ ,  $p =$   
284  $0.0178$ ). More importantly, the PI was statistically equivalent to the PI on the trained

285 grating (Figure 5F left panel;  $t(7) = 0.002$ ,  $p = 0.999$ ). Consistently, perceptual training  
286 on a plaid stimulus also transferred to the component grating that moved in the same  
287 apparent direction (Figure 5E right panel, pre-/post-test,  $t(5) = 3.336$ ,  $p = 0.0207$ ; Figure  
288 5F right panel, PI,  $t(5) = 2.971$ ,  $p = 0.0311$ ). Also, the PI on the untrained component was  
289 not statistically different from the PT on the original trained plaid (Figure 5F right panel,  
290 PI,  $t(5) = 1.29$ ,  $p = 0.2533$ ). The bidirectional transfer between the component and the  
291 plaid stimuli that moved to the same directions suggest that perceptual training most  
292 likely alters the computation in the visual units that process the pattern motion direction.  
293 Moreover, training effects on a component did not significantly transfer to a plaid that  
294 included the trained component, but moved in a different direction (Figure 5E left panel,  
295 pre-/post-test,  $t(7) = 0.784$ ,  $p = 0.4586$ ; Figure 5F left panel, PI,  $t(7) = 0.405$ ,  $p = 0.6978$ ).  
296 Plaid training also did not improve the performance on its two constituent components  
297 (Figure 5E right panel, pre-/post-test,  $t(5) = 0.305$ ,  $p = 0.7709$ ; Figure 5F right panel, PI,  
298  $t(5) = 0.963$ ,  $p = 0.3797$ ). Taken together, these findings suggest that pattern-dependent  
299 learning at the middle-level motion system, rather than component-dependent learning at  
300 the low-level motion system, plays a pivotal role in mediating learning transfer of motion.  
301  
302

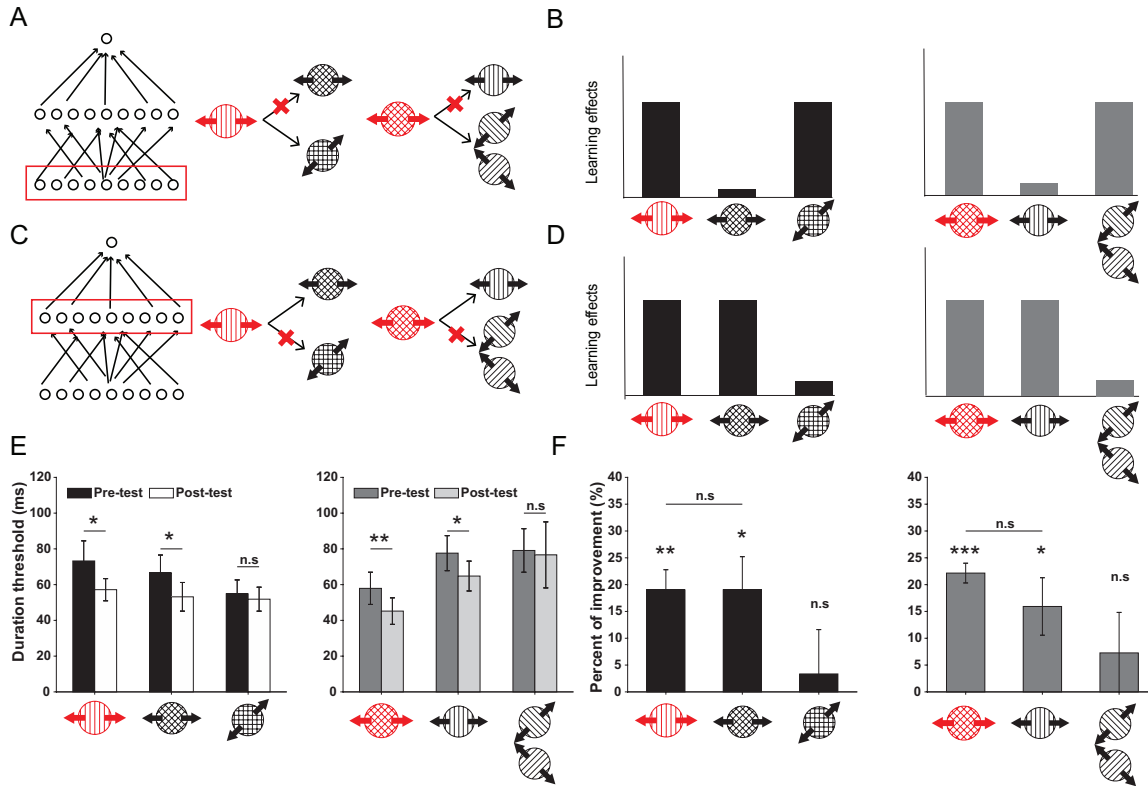

303

304

305

306

307

308

309

310

311

312

313

314

315

316

317

318

319

320

321

322

323

324

325

326

Figure 5. Schematic illustrations (A, C), predictions (B, D) and empirical results (E-F) for component-dependent and pattern-dependent VPL. **A.** The component-dependent VPL takes place at the lowest level of motion processing, as indicated by the red rectangle. Here, training on a component stimulus should only transfer to the plaid stimulus that comprises the trained component. Moreover, training on a plaid stimulus should only transfer to its two constituent components. **B.** Learning effects as predicted by component-dependent learning in panel A. **C-D.** Illustrations of the pattern-dependent perceptual learning and its predicted learning effects, following conventions in panels A and B. Here, plasticity takes place at the middle stage of motion processing. (E) Duration thresholds at pre-/post-test across stimulus conditions in the component (left panel) and the plaid training (right panel), respectively. (F) Learning effects quantified as percent of improvement (PI%) across stimulus conditions and training regimes. The overall pattern mimics the predictions in (D), indicating that plasticity likely occurs at the middle-level of motion analysis. For all subplots, error bars denote  $\pm 1$  SEM across subjects. Significance symbol conventions are \*:  $p < 0.05$ ; \*\*:  $p < 0.01$ ; \*\*\*:  $p < 0.001$ ; n.s.: non-significant. Same definitions of error bars and symbol conventions are kept for all figures in this paper.

### 327 **Specificities to direction, speed, size, and contrast**

328 We have thus far focused on experimentally disentangling component-dependent from  
329 pattern-dependent VPL, with the results arguing against low-level component-dependent  
330 VPL. What remains unclear, however, is whether the perceptual training led to  
331 enhancements in the processing of sensory features or high-level non-sensory attributes.  
332 For instance, participants might learn motion directions as abstract concepts <sup>16</sup> or be more  
333 familiar with the general task statistics (e.g., stimulus timing, stimulus-response  
334 association <sup>17</sup>). In this case, plasticity takes place in higher brain hierarchy that is  
335 independent of the sensory processing. To further delineate the plasticity in the sensory  
336 (Figure 6A-B) or the non-sensory processing (Figure 6C-D), we examined the tolerance  
337 of our training across several other forms of stimulus variations, i.e., direction, speed,  
338 size, and contrast. The prediction is that if the plasticity is largely limited to sensory  
339 processing, learning should be confined to the trained stimuli; otherwise learning effects  
340 will transfer irrespective of the variations in other stimulus features.

341 The results indicated a notable specificity to stimulus variations. In the  
342 component-training group, we did not find significant transfer for trained and test stimuli  
343 that differed in motion directions (Figure 6E left panel, pre-/post-test,  $t(7) = 1.886$ ,  $p =$   
344  $0.101$ ; Figure 6F left panel, PI,  $t(7) = 2.016$ ,  $p = 0.084$ ). We also found no significant  
345 transfer to test stimuli that have smaller size (Figure 6E left panel, pre-/post-test,  $t(7) =$   
346  $1.308$ ,  $p = 0.232$ ; Figure 6F left panel, PI,  $t(7) = 1.376$ ,  $p = 0.211$ ) or lower contrast  
347 (Figure 6E left panel, pre-/post-test,  $t(7) = 2.187$ ,  $p = 0.065$ ; Figure 6F left panel, PI,  $t(7)$   
348  $= 1.971$ ,  $p = 0.089$ ).

349 Similarly, if component motion directions were switched such that the resulting  
350 plaid moves in an orthogonal direction, transfer effects in the plaid-training group were  
351 not statistically evident (Figure 6E right panel, pre-/post-test,  $t(5) = 1.268$ ,  $p = 0.261$ ;  
352 Figure 6F right panel, PI,  $t(5) = 1.645$ ,  $p = 0.161$ ). We also investigated how changing  
353 stimulus speed affects learning transfer. When the grating speed was increased to match  
354 the apparent speed of the trained plaid, the transfer effect was not significant (Figure 6E  
355 right panel, pre-/post-test,  $t(5) = 1.257$ ,  $p = 0.265$ ; Figure 6F right panel, PI,  $t(5) = 1.635$ ,  
356  $p = 0.163$ ).

357 Taken together, we find that motion VPL is specific to stimulus direction, speed,  
 358 size, and contrast. These results demonstrate that our training has strong susceptibilities  
 359 to variations in basic visual features. Such strong dependencies indicate that a broadly  
 360 tuned non-sensory learning mechanism unlikely plays an important role in observed  
 361 learning because it predicts a broad transfer over variations in low-level stimulus features.  
 362 Note that we cannot completely eliminate the possibility of changes in sensory readout  
 363 mechanisms since, theoretically, a refined readout mechanism can be sensitive to changes  
 364 in sensory features [37,38](#). Nonetheless, these results suggest the pivotal roles of basic  
 365 stimulus features in perceptual learning of motion.  
 366

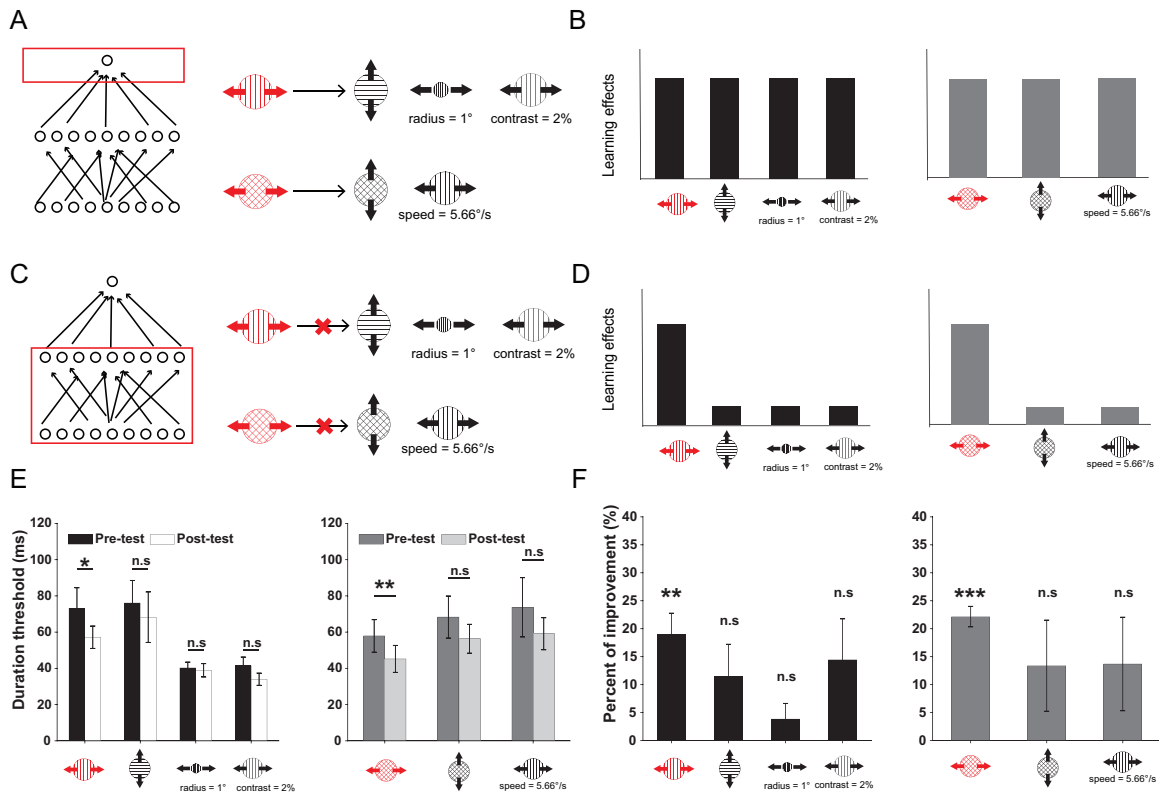

367

368

369

370

371

372

373

374

375

376

Figure 6. Specificity of motion VPL to basic sensory features. **A-B**. Illustrations and predictions of the plasticity at the highest-level stage (e.g., PFC) in the three-layer network. This mechanism predicts that training on a component or a plaid stimulus should be generalizable regardless of the variations in low-level visual features, such as direction, speed, size, and contrast. **C-D** Illustrations and predictions akin to (A-B), expect that the plasticity occurs within the general sensory representation stage. This scheme predicts that training on a component or a plaid stimulus should

377 exhibit minimal transfer to the stimuli that differ in basic visual features. (E)  
378 Duration thresholds at pre-/post-test across stimulus conditions in two  
379 training groups. (F) Empirical learning effects, quantified as percent of  
380 improvement (PI%), across stimuli and training groups. The transfer pattern  
381 of learning is more consistent with predictions in (D). No significant transfer  
382 in all other stimulus conditions is noted, implying the plasticity within the  
383 sensory representation level as shown in (C).  
384

## 385 **DISCUSSION**

386 Elucidating where in the visual processing hierarchy plasticity associated with VPL takes  
387 place has been a key question in perceptual learning research over the past decades. Here,  
388 we addressed this question in the domain of motion perception. We trained participants to  
389 identify motion directions of either component motion (a drifting grating) or pattern  
390 motion (a drifting plaid), and assessed transfer of learning to a variety of carefully  
391 controlled stimulus conditions. The bidirectional transfer of learning between component  
392 and pattern motion provides evidence that learning effects most likely take place at the  
393 middle-levels of processing where component motions are combined into plaid percepts,  
394 and, at the same time, rules out plasticity at the low-levels where complex motions are  
395 represented as components. In addition, we also observed specificities to the trained  
396 direction, speed, stimulus size, and contrast. These results are in line with the previous  
397 findings that VPL is generally vulnerable to the variations in basic feature dimensions  
398 and argue against plasticity in high-level brain areas that represent non-sensory cognitive  
399 factors, such as general task statistics and decision rules [15,16,17](#).

400 Our results are of significance for understanding mechanisms underlying motion  
401 perception. As one of the key research topics in vision science, dissociable functional  
402 roles of the low-level and the middle-level motion system have been well documented  
403 [22,39,40](#). The seminal paper by [Adelson and Movshon](#) <sup>32</sup> documented how moving plaid  
404 percepts can arise from component gratings. Subsequent neurophysiological work  
405 discovered distinct tuning properties of individual neurons in V1 and MT with  
406 preferences toward component and plaid representations, respectively <sup>30</sup>. These findings  
407 were generalized to humans. [Huk and Heeger](#) <sup>41</sup> reported robust fMRI adaptation to  
408 pattern motion in the human motion-sensitive area hMT+. Thus, the phenomenon of



409 component and pattern motion serves as a good benchmark for studying visual hierarchy  
410 of motion processing.

411         Although we have a good understanding of visual motion processing hierarchy,  
412 we know little about the roles different stages play in VPL. We address this question by  
413 showing that training on component or pattern motion bi-directionally transfers to each  
414 other if the two stimuli share the same apparent motion direction. These results suggest  
415 that, when a plaid motion stimulus is being learned, learning signals might preferentially  
416 refine the pattern-selective units that respond to the apparent motion direction, but not the  
417 component sensitive units. While there have been many behavioral studies of motion  
418 VPL, to our knowledge, no studies employed an experimental design that allowed  
419 distinguishing between plasticity at low and at the middle levels of motion processing.  
420 For instance, VPL studies typically relied on random-dot-kinematogram stimuli or  
421 trained subjects on fine direction discrimination tasks [7,42,43](#). Studies that used gratings  
422 only tested contrast thresholds for coarse motion direction judgments [44](#).

423         Our study also constrains theoretical models of VPL. Two distinct computational  
424 frameworks of VPL have emerged so far, where learning either improves the quality of  
425 sensory encoding or optimizes high-level readout and decision mechanism that can in  
426 turn promote perceptual sensitivity. Empirical evidence, however, is highly contentious.  
427 Early psychophysical studies on motion VPL demonstrated the considerable specificity to  
428 the trained direction [7,8](#), implying the plasticity among direction-selective units. However,  
429 specificities in motion VPL have also been shown to be mediated by other factors, such  
430 as task difficulty [45,46](#), exposure to other directions [47](#), external noise [44](#). This debate in  
431 VPL psychophysics is mirrored by a similar debate with respect to the neural substrates  
432 of VPL. For example, after training monkeys on a motion direction decision task, [Law](#)  
433 [and Gold](#) [27](#) found pronounced behaviorally relevant changes in neural responses in area  
434 LIP, but minimal changes in neural activities in area MT. This study advocates a  
435 mechanism beyond the sensory-representation level, where training results in a more  
436 efficient extraction of useful sensory information rather than in an enhancement of  
437 sensory representations per se. In contrast, recent fMRI studies found that motion VPL  
438 refines the cortical tuning of the human MT, emphasizing the pivotal role of enhancement  
439 at sensory-representation level [48,49](#). Notably, the mechanistic role of high-level cognitive

440 influences in sensory processing is still largely unknown. Previous studies have suggested  
441 at least two broad categories, mechanisms that are sensory (e.g., selective readout) and  
442 those that are non-sensory (e.g., conceptual learning, rule-based learning). While  
443 disentangling between these higher level processes is beyond the scope of this paper, the  
444 observed specificity to basic stimulus features argues against non-sensory cognitive  
445 factors.

446         What are the possible neural underpinnings of the observed empirical findings in  
447 the present work? We surmise that several mechanisms may coexist and interact. First,  
448 because training on a plaid motion stimulus does not fully transfer to its two components  
449 (Figure 5E), we conclude that a significant part of the relevant plasticity occurs  
450 downstream from the low-level motion mechanisms. Given the evidence that MT neurons  
451 analyze pattern motion by selectively integrating inputs from a population of V1 neurons  
452 [38](#), one possible mechanism is that learning improves information transmission from the  
453 low-level to the middle-level motion processing. Such a mechanism is consistent with  
454 findings of a recent study where attention was shown to improve the amount of  
455 information transferred from V1 to hMT+ [50](#). Moreover, learning effects in our study are  
456 specific to direction, speed, contrast, and size, indicating critical roles of neuronal tuning  
457 to these low-level visual features. For example, stimulus contrast and size have strong  
458 influences on neural responses in motion processing [51](#). This is also in line with our  
459 previous findings showing that motion perception is strongly modulated by stimulus  
460 contrast and size [52,53](#)—behavioral findings that have been linked to mechanisms within  
461 area MT [54,55](#).

462         In summary, our study provides evidence for the training-induced plasticity in the  
463 intermediate stage of motion processing, and highlights the significance of basic motion-  
464 related visual attributes in mediating the transfer of motion VPL.

465 **References**

- 466 1 Sasaki, Y., Nanez, J. E. & Watanabe, T. Advances in visual perceptual learning  
467 and plasticity. *Nat. Rev. Neurosci.* **11**, 53-60 (2010).
- 468 2 Watanabe, T. & Sasaki, Y. Perceptual learning: toward a comprehensive theory.  
469 *Annu. Rev. Psychol.* **66**, 197-221 (2015).
- 470 3 Adini, Y., Sagi, D. & Tsodyks, M. Context-enabled learning in the human visual  
471 system. *Nature.* **415**, 790-793 (2002).
- 472 4 Adini, Y., Wilkowsky, A., Haspel, R., Tsodyks, M. & Sagi, D. Perceptual learning  
473 in contrast discrimination: the effect of contrast uncertainty. *J Vis.* **4**, 993-1005 (2004).
- 474 5 Yu, C., Klein, S. A. & Levi, D. M. Perceptual learning in contrast discrimination  
475 and the (minimal) role of context. *J Vis.* **4**, 169-182 (2004).
- 476 6 Fahle, M. Specificity of learning curvature, orientation, and vernier  
477 discriminations. *Vision Res.* **37**, 1885-1895 (1997).
- 478 7 Ball, K. & Sekuler, R. A specific and enduring improvement in visual motion  
479 discrimination. *Science.* **218**, 697-698 (1982).
- 480 8 Ball, K. & Sekuler, R. Direction-specific improvement in motion discrimination.  
481 *Vision Res.* **27**, 953-965 (1987).
- 482 9 Fine, I. & Jacobs, R. A. Perceptual learning for a pattern discrimination task.  
483 *Vision Res.* **40**, 3209-3230 (2000).
- 484 10 Bi, T., Chen, N., Weng, Q., He, D. & Fang, F. Learning to discriminate face  
485 views. *J. Neurophysiol.* **104**, 3305-3311 (2010).
- 486 11 Furmanski, C. S. & Engel, S. A. Perceptual learning in object recognition: object  
487 specificity and size invariance. *Vision Res.* **40**, 473-484 (2000).
- 488 12 Fahle, M. & Edelman, S. Long-term learning in vernier acuity: effects of stimulus  
489 orientation, range and of feedback. *Vision Res.* **33**, 397-412 (1993).
- 490 13 Xiao, L. Q. *et al.* Complete transfer of perceptual learning across retinal locations  
491 enabled by double training. *Curr. Biol.* **18**, 1922-1926 (2008).
- 492 14 Wang, R., Zhang, J. Y., Klein, S. A., Levi, D. M. & Yu, C. Task relevancy and  
493 demand modulate double-training enabled transfer of perceptual learning. *Vision Res.* **61**,  
494 33-38 (2012).
- 495 15 Kahnt, T., Grueschow, M., Speck, O. & Haynes, J. D. Perceptual learning and  
496 decision-making in human medial frontal cortex. *Neuron.* **70**, 549-559 (2011).

- 497 16 Wang, R. *et al.* Perceptual Learning at a Conceptual Level. *J. Neurosci.* **36**, 2238-  
498 2246 (2016).
- 499 17 Zhang, J. Y. *et al.* Rule-based learning explains visual perceptual learning and its  
500 specificity and transfer. *J. Neurosci.* **30**, 12323-12328 (2010).
- 501 18 Grill-Spector, K. & Malach, R. The human visual cortex. *Annu. Rev. Neurosci.*  
502 **27**, 649-677 (2004).
- 503 19 Wandell, B. A. Computational neuroimaging of human visual cortex. *Annu. Rev.*  
504 *Neurosci.* **22**, 145-173 (1999).
- 505 20 Park, W. J. & Tadin, D. Motion Perception in *Stevens' Handbook of Experimental*  
506 *Psychology and Cognitive Neuroscience* Vol. 2 *Series* (ed John Serences) Ch. Sensation,  
507 Perception, and Attention, 415-488 (Wiley, 2018).
- 508 21 Hubel, D. H. & Wiesel, T. N. Receptive fields and functional architecture of  
509 monkey striate cortex. *J. Physiol.* **195**, 215-243 (1968).
- 510 22 Born, R. T. & Bradley, D. C. Structure and function of visual area MT. *Annu.*  
511 *Rev. Neurosci.* **28**, 157-189 (2005).
- 512 23 Newsome, W. T. & Pare, E. B. A selective impairment of motion perception  
513 following lesions of the middle temporal visual area (MT). *J. Neurosci.* **8**, 2201-2211  
514 (1988).
- 515 24 Servos, P., Osu, R., Santi, A. & Kawato, M. The neural substrates of biological  
516 motion perception: an fMRI study. *Cereb. Cortex.* **12**, 772-782 (2002).
- 517 25 Antal, A. *et al.* Direct current stimulation over V5 enhances visuomotor  
518 coordination by improving motion perception in humans. *J. Cogn. Neurosci.* **16**, 521-527  
519 (2004).
- 520 26 Shadlen, M. N. & Newsome, W. T. Neural basis of a perceptual decision in the  
521 parietal cortex (area LIP) of the rhesus monkey. *J. Neurophysiol.* **86**, 1916-1936 (2001).
- 522 27 Law, C. T. & Gold, J. I. Neural correlates of perceptual learning in a sensory-  
523 motor, but not a sensory, cortical area. *Nat. Neurosci.* **11**, 505-513 (2008).
- 524 28 Latimer, K. W., Yates, J. L., Meister, M. L., Huk, A. C. & Pillow, J. W.  
525 NEURONAL MODELING. Single-trial spike trains in parietal cortex reveal discrete  
526 steps during decision-making. *Science.* **349**, 184-187 (2015).
- 527 29 Gold, J. I. & Shadlen, M. N. The neural basis of decision making. *Annu. Rev.*  
528 *Neurosci.* **30**, 535-574 (2007).
- 529 30 Rodman, H. R. & Albright, T. D. Single-unit analysis of pattern-motion selective  
530 properties in the middle temporal visual area (MT). *Exp. Brain Res.* **75**, 53-64 (1989).

- 531 31 Movshon, J. A. & Newsome, W. T. Visual response properties of striate cortical  
532 neurons projecting to area MT in macaque monkeys. *J. Neurosci.* **16**, 7733-7741 (1996).
- 533 32 Adelson, E. H. & Movshon, J. A. Phenomenal coherence of moving visual  
534 patterns. *Nature.* **300**, 523-525 (1982).
- 535 33 Pelli, D. G. The VideoToolbox software for visual psychophysics: Transforming  
536 numbers into movies. *Spat. Vis.* **10**, 437-442 (1997).
- 537 34 Foss-Feig, J. H., Tadin, D., Schauder, K. B. & Cascio, C. J. A substantial and  
538 unexpected enhancement of motion perception in autism. *J. Neurosci.* **33**, 8243-8249  
539 (2013).
- 540 35 Tadin, D., Lappin, J. S. & Blake, R. Fine temporal properties of center-surround  
541 interactions in motion revealed by reverse correlation. *J. Neurosci.* **26**, 2614-2622 (2006).
- 542 36 Lappin, J. S., Tadin, D., Nyquist, J. B. & Corn, A. L. Spatial and temporal limits  
543 of motion perception across variations in speed, eccentricity, and low vision. *J Vis.* **9**, 30  
544 31-14 (2009).
- 545 37 Doshier, B. A., Jeter, P., Liu, J. & Lu, Z. L. An integrated reweighting theory of  
546 perceptual learning. *Proc Natl Acad Sci U S A.* **110**, 13678-13683 (2013).
- 547 38 Rust, N. C., Mante, V., Simoncelli, E. P. & Movshon, J. A. How MT cells  
548 analyze the motion of visual patterns. *Nat. Neurosci.* **9**, 1421-1431 (2006).
- 549 39 Simoncelli, E. P. & Heeger, D. J. A model of neuronal responses in visual area  
550 MT. *Vision Res.* **38**, 743-761 (1998).
- 551 40 Adelson, E. H. & Bergen, J. R. Spatiotemporal energy models for the perception  
552 of motion. *J. Opt. Soc. Am. A.* **2**, 284-299 (1985).
- 553 41 Huk, A. C. & Heeger, D. J. Pattern-motion responses in human visual cortex. *Nat.*  
554 *Neurosci.* **5**, 72-75 (2002).
- 555 42 Liu, Z. & Weinshall, D. Mechanisms of generalization in perceptual learning.  
556 *Vision Res.* **40**, 97-109 (2000).
- 557 43 Shibata, K. *et al.* Decoding reveals plasticity in V3A as a result of motion  
558 perceptual learning. *PLoS One.* **7**, e44003 (2012).
- 559 44 Lu, Z. L., Chu, W. & Doshier, B. A. Perceptual learning of motion direction  
560 discrimination in fovea: separable mechanisms. *Vision Res.* **46**, 2315-2327 (2006).
- 561 45 Ahissar, M. & Hochstein, S. Task difficulty and the specificity of perceptual  
562 learning. *Nature.* **387**, 401-406 (1997).

- 563 46 Liu, Z. L. Perceptual learning in motion discrimination that generalizes across  
564 motion directions. *Proceedings of the National Academy of Sciences of the United States*  
565 *of America*. **96**, 14085-14087 (1999).
- 566 47 Zhang, J. Y. & Yang, Y. X. Perceptual learning of motion direction  
567 discrimination transfers to an opposite direction with TPE training. *Vision Res.* **99**, 93-98  
568 (2014).
- 569 48 Chen, N. *et al.* Sharpened cortical tuning and enhanced cortico-cortical  
570 communication contribute to the long-term neural mechanisms of visual motion  
571 perceptual learning. *NeuroImage*. **115**, 17-29 (2015).
- 572 49 Chen, N., Cai, P., Zhou, T., Thompson, B. & Fang, F. Perceptual learning  
573 modifies the functional specializations of visual cortical areas. *Proc Natl Acad Sci U S A*.  
574 **113**, 5724-5729 (2016).
- 575 50 Saproo, S. & Serences, J. T. Attention improves transfer of motion information  
576 between V1 and MT. *J. Neurosci.* **34**, 3586-3596 (2014).
- 577 51 Pack, C. C., Hunter, J. N. & Born, R. T. Contrast dependence of suppressive  
578 influences in cortical area MT of alert macaque. *J. Neurophysiol.* **93**, 1809-1815 (2005).
- 579 52 Tadin, D., Lappin, J. S., Gilroy, L. A. & Blake, R. Perceptual consequences of  
580 centre-surround antagonism in visual motion processing. *Nature*. **424**, 312-315 (2003).
- 581 53 Tadin, D. Suppressive mechanisms in visual motion processing: From perception  
582 to intelligence. *Vision Res.* **115**, 58-70 (2015).
- 583 54 Schallmo, M.-P. *et al.* Suppression and facilitation of human neural responses.  
584 *eLife*. **7** (2018).
- 585 55 Liu, L. D., Haefner, R. M. & Pack, C. C. A neural basis for the spatial  
586 suppression of visual motion perception. *eLife*. **5** (2016).  
587
